# Supplementary material
Source: Springer Nature journal article supplement (https://www.springermedizin.de/resource/supplementary/12876_2011_656_MOESM4_ESM.pdf/9437188)

**Liver MPO (U/G)**

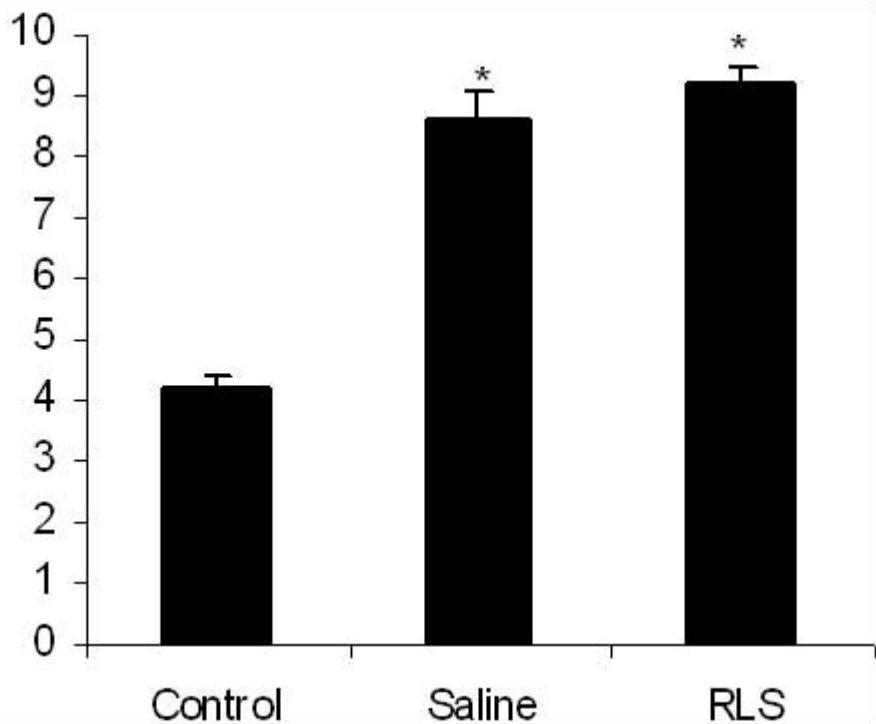

Supplement: MOESM4 [file 9437188]
